# Supplementary material for: Bacillus velezensis 5113 Induced Metabolic and Molecular Reprogramming during Abiotic Stress Tolerance in Wheat
Source: PubMed Central journal article supplement (PMC6841942; doi:10.1038/s41598-019-52567-x), 2019-11-08
Supplement: 41598_2019_52567_MOESM1_ESM.pdf [file 41598_2019_52567_MOESM1_ESM.pdf]

***Bacillus velezensis* 5113 Induced Metabolic and Molecular Reprogramming during  
Abiotic Stress Tolerance in Wheat.**

Islam A. Abd El-Daim, Sarosh Bejai and Johan Meijer

**Supplementary Figures**

**Fig. S1:** Effect of abiotic stress factors (heat, cold and drought) on the plant ascorbate-glutathione redox cycle in the leaves of 5113-treated wheat seedlings.

**Fig. S2:** Principle component analysis of metabolome effects of 5113 treatment and drought stress as 7 days without water.

**Fig. S3:** Principle component analysis of metabolome effects of 5113 treatment and cold stress as 12h at -5 °C.

**Fig. S4:** Typical two-dimensional gel profiles of proteins from wheat leaves after bacterial inoculation with 5113 and abiotic stress treatments (heat and cold).

**Fig. S5:** Typical two-dimensional gel profiles of proteins from wheat leaves after bacterial inoculation with 5113 and abiotic stress treatment (drought stress).



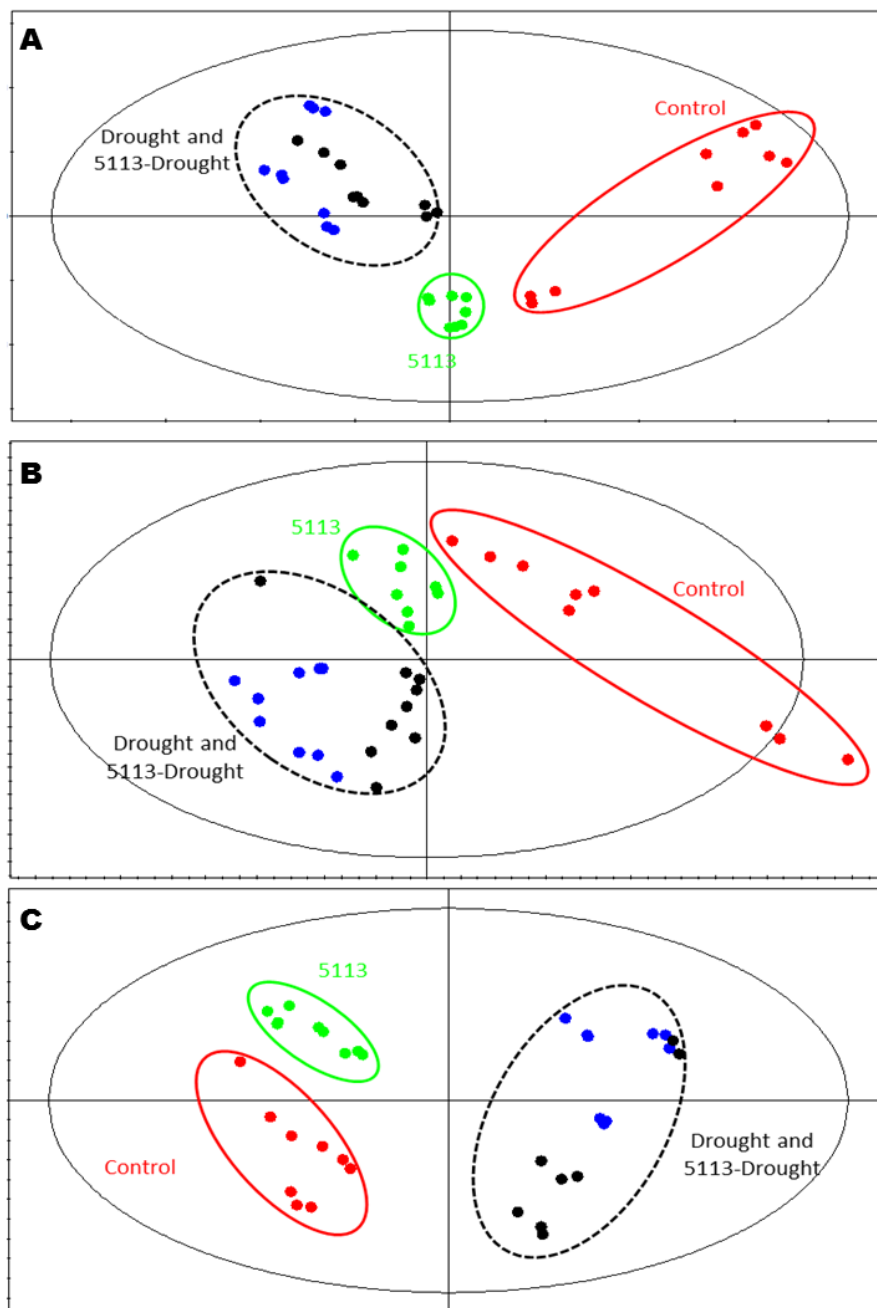

**Fig. S2:** Principle Component Analysis (PCA) of metabolome effects of 5113 treatment and 7 days without water (drought stress). Plant samples represented untreated plants (red dots); 5113-treated (green dots), drought stress (blue dots); or drought-stressed and 5113-treated leaves (black dots). Analysis was based on positive mode ESI-MS (**A**); negative mode ESI-MS (**B**) and NMR (**C**). All treatments in these analyses were represented by 9 data points (three biological samples and three technical repeats)

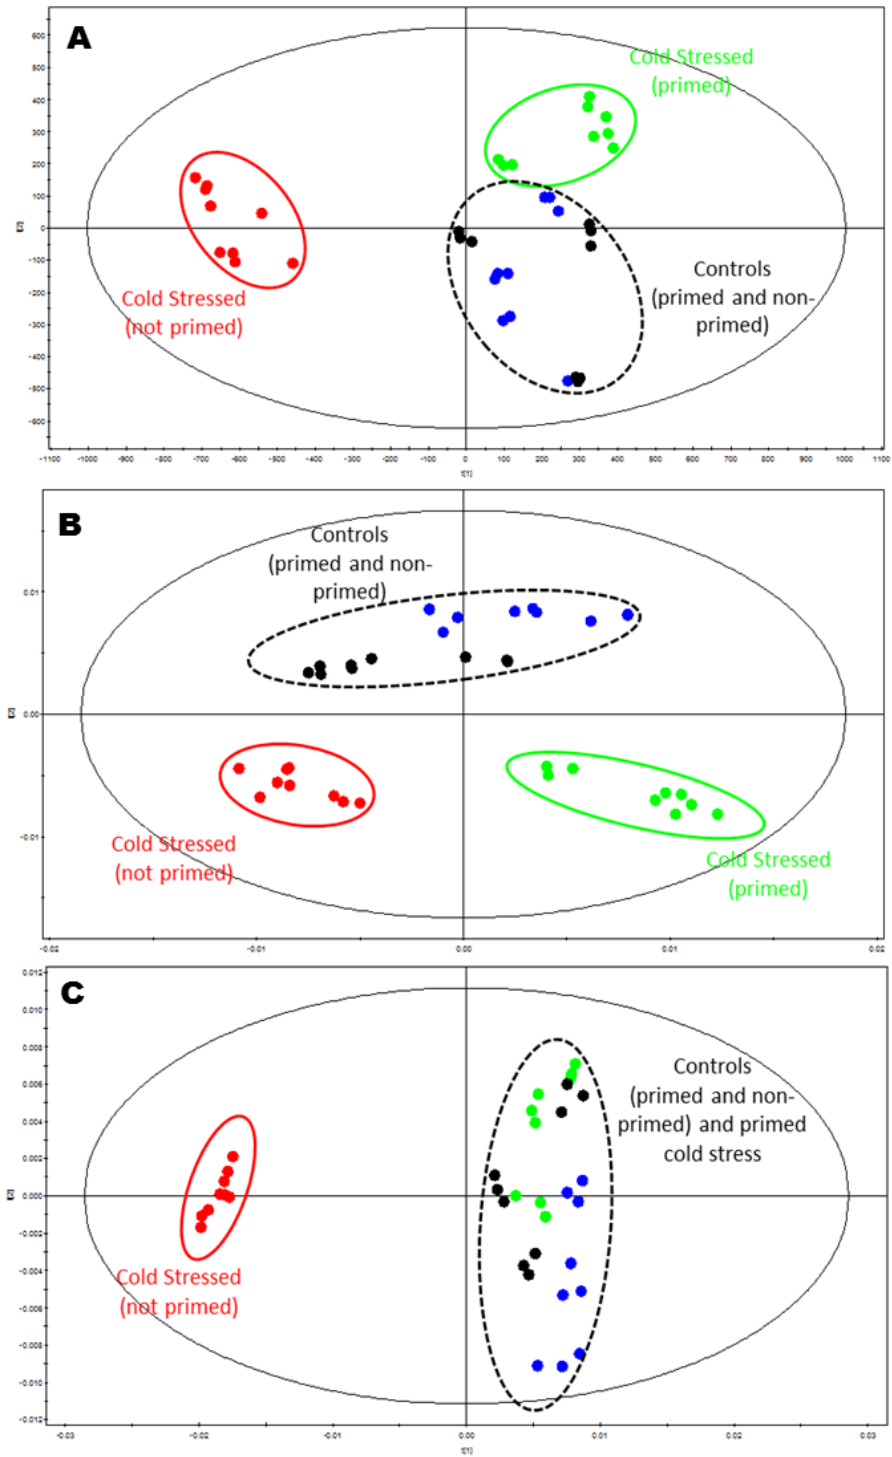

**Fig. S3:** Principle Component Analysis (PCA) of metabolome effects of 5113 treatment and cold stress as 12 h at  $-5^{\circ}\text{C}$ . Plant samples represented untreated plants (red dots); 5113-treated (green dots), cold stress (blue dots); or cold-stressed and 5113-treated leaves (black dots). Analysis was based on positive mode ESI-MS (**A**); negative mode ESI-MS (**B**) and NMR (**C**). All treatments in these analyses were represented by 9 data points (three biological samples and three technical repeats)

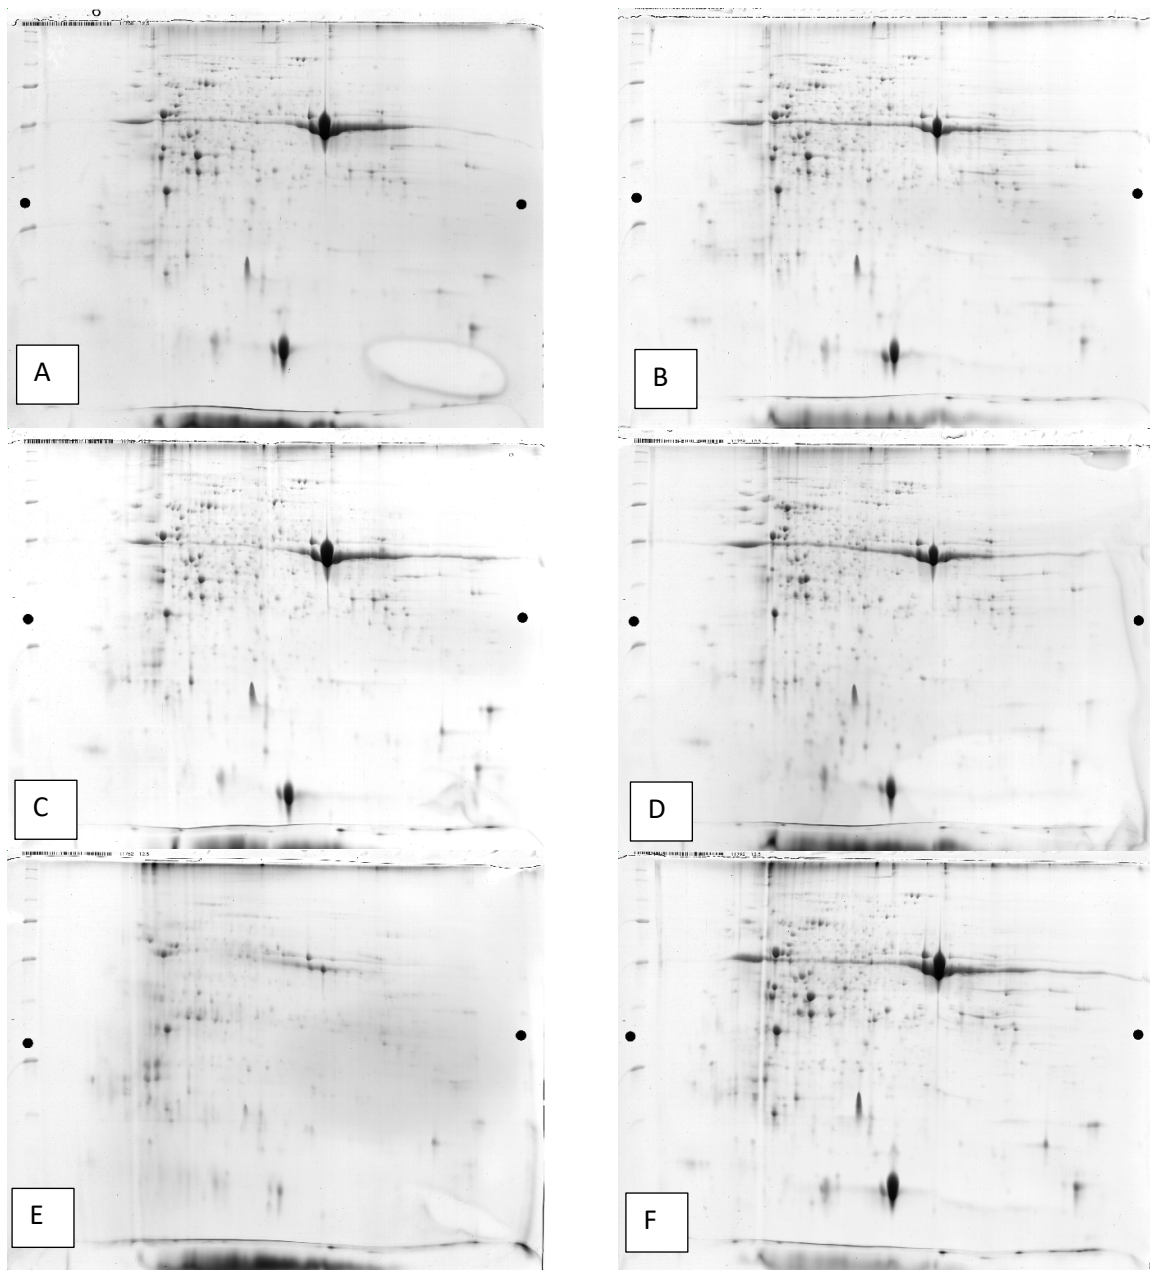

**Fig. S4:** Typical (un-processed) two-dimensional gel profiles of protein from wheat leaves after bacterial inoculation with 5113 and abiotic stress treatments (heat and cold). **A:** Control, **B:** Control inoculated, **C:** Heat-stressed (12h at 45°C), **D:** Heat-stressed inoculated (12h at 45°C), **E:** Cold-stressed (12h at -5°C), **F:** Cold-stressed inoculated (12h at -5°C).

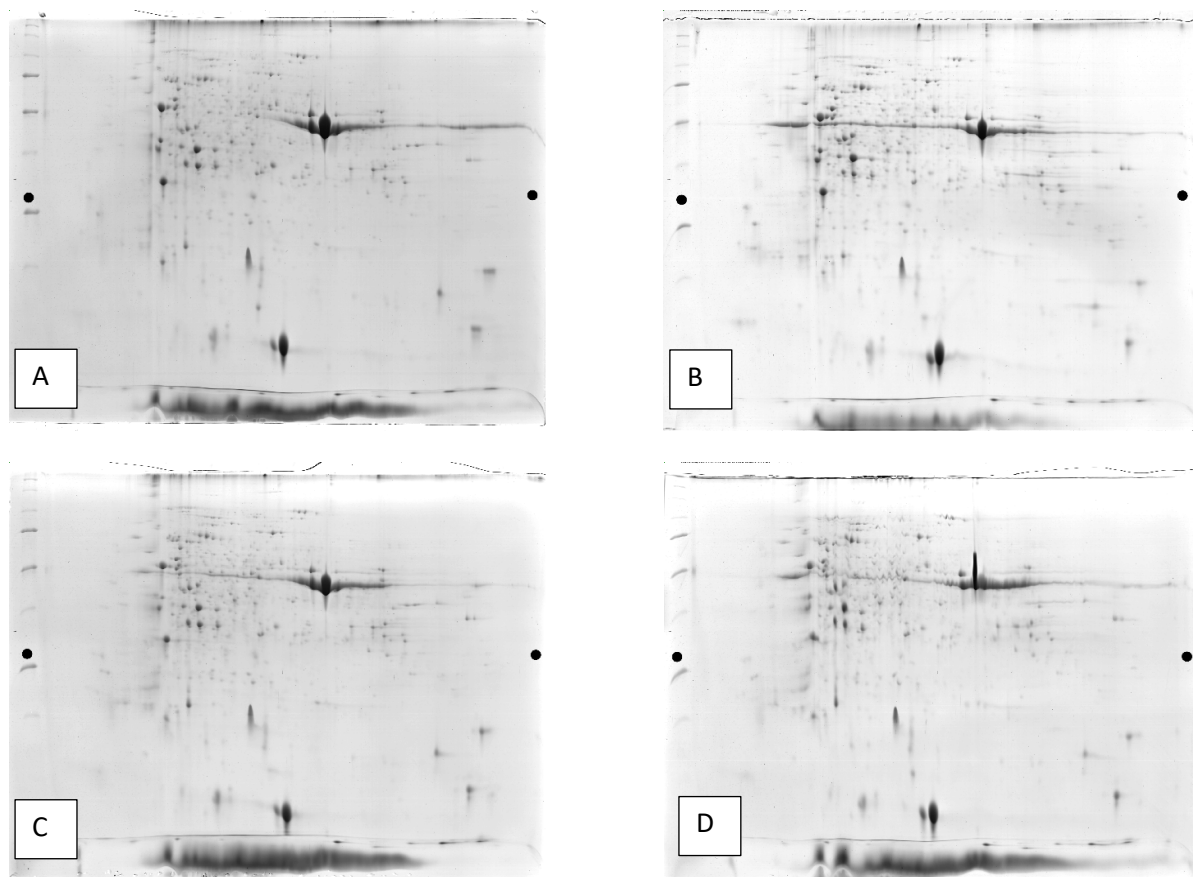

**Fig. S5:** Typical (un-processed) two-dimensional gel profiles of proteins from wheat leaves after bacterial inoculation with 5113 and drought stress **A:** Control, **B:** Control inoculated, **C:** Drought-stressed (7 days without water) and **D:** Drought-stressed inoculated (7 days without water).
