# Supplementary material for: Bacillus velezensis 5113 Induced Metabolic and Molecular Reprogramming during Abiotic Stress Tolerance in Wheat
Source: PubMed Central journal article supplement (PMC6841942; doi:10.1038/s41598-019-52567-x), 2019-11-08
Supplement: 41598_2019_52567_MOESM2_ESM.pdf [file 41598_2019_52567_MOESM2_ESM.pdf]

***Bacillus velezensis* 5113 Induced Metabolic and Molecular Reprogramming during Abiotic Stress Tolerance in Wheat.**

Islam A. Abd El-Daim, Sarosh Bejai and Johan Meijer

**Supplementary Table**

**Table S1:** Further data from protein analysis. Differentially expressed proteins were analyzed by peptide mapping and/or sequence analysis using mass spectrometry.

| ID  | MASCOT value | % coverage <sup>a</sup> | mass values <sup>b</sup> |         | Peptide sequence <sup>c</sup> |
|-----|--------------|-------------------------|--------------------------|---------|-------------------------------|
|     |              |                         | searched                 | matched |                               |
| 3   | 142          | 18                      | 30                       | 17      |                               |
| 55  | 194          | 38                      | 59                       | 15      |                               |
| 137 | 204          | 37                      | 42                       | 20      |                               |
| 150 | 30           | 2                       |                          |         | SNCFHASDDK                    |
| 155 | 158          | 56                      | 42                       | 14      |                               |
| 166 | 70           | 16                      | 23                       | 7       |                               |
| 176 | 93           | 23                      | 32                       | 9       |                               |
| 192 | 93           | 41                      | 54                       | 9       |                               |
| 194 | 75           | 21                      | 23                       | 9       |                               |
| 202 | 85           | 36                      | 21                       | 6       |                               |
| 203 | 128          | 39                      | 40                       | 12      |                               |
| 206 | 36           | 3                       |                          |         | YQAFELIHAR                    |
| 218 | 45           | 3                       |                          |         | IAYQFYR                       |
| 238 | 145          | 46                      | 32                       | 16      |                               |
| 242 | 42           | 3                       |                          |         | FKESEIYHCR                    |
| 269 | 103          | 50                      | 19                       | 7       |                               |
| 271 | 47           | 1                       |                          |         | QDGSPSVGEK                    |
| 285 | 86           | 33                      | 20                       | 6       |                               |

<sup>a</sup> Indicates the protein sequence coverage by the matching peptide fragments or peptide sequences.

<sup>b</sup> Indicates the number of mass values searched with and hits (including methionine modifications, while carbamidomethyl groups were fixed) and with peptide mass tolerance +/- 0.05 Da.

<sup>c</sup> Amino acid sequences derived by MS-MS analysis of peptides.
